# Supplementary material for: Molecular characterization of highly pathogenic avian influenza H5N8 viruses isolated from Baikal teals found dead during a 2014 outbreak in Korea
Source: PubMed Central journal article supplement — J Vet Sci. 2016 Sep 20;17(3):299–306. doi: 10.4142/jvs.2016.17.3.299 (PMC5037296; doi:10.4142/jvs.2016.17.3.299), 2016-09-20
Supplement: jvs-17-299-s001.pdf [file jvs-17-299-s001.pdf]

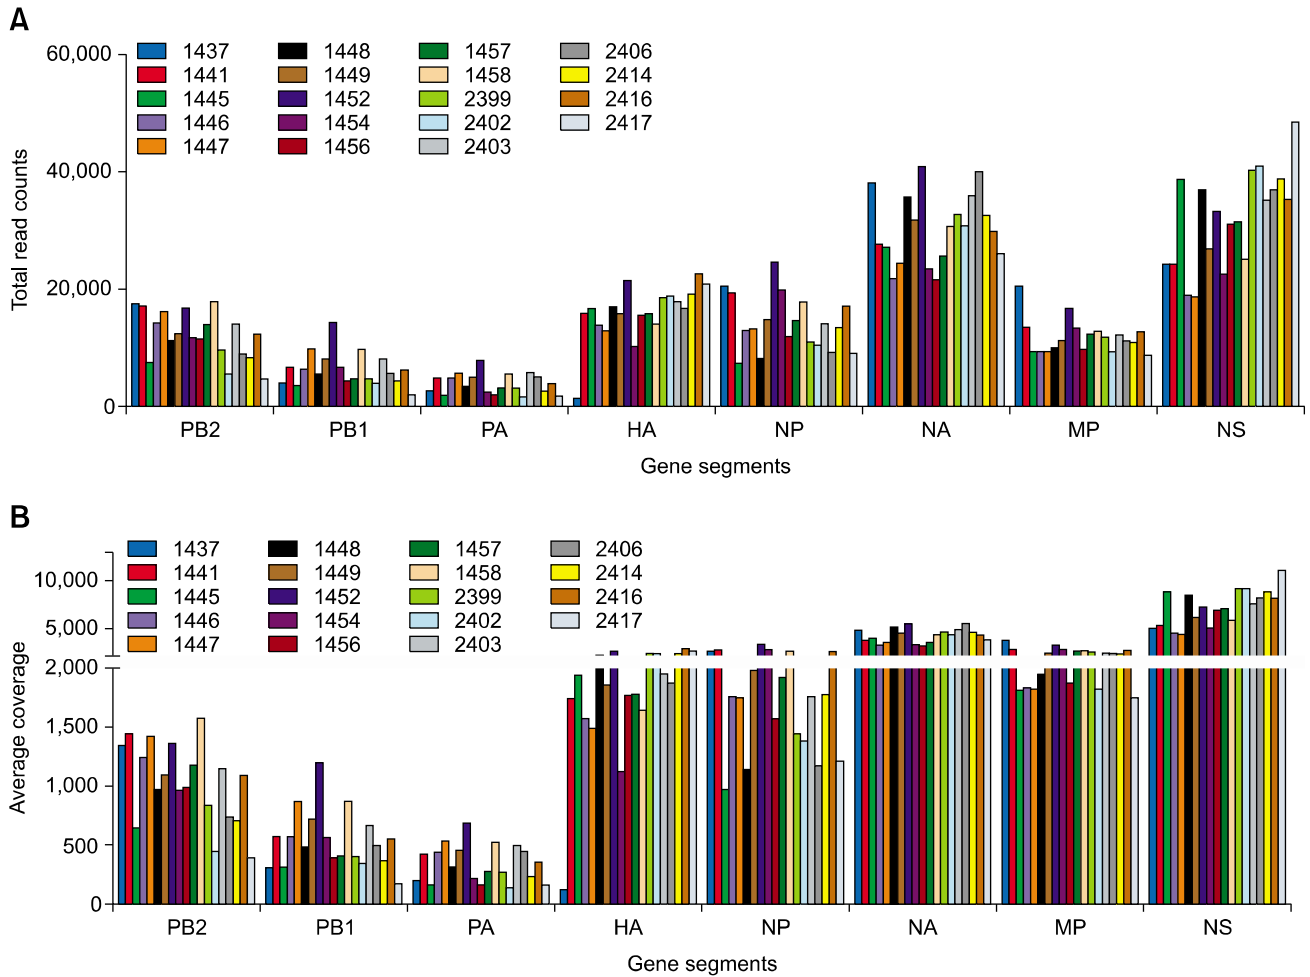

**Supplementary Fig. 1.** High-throughput sequencing analysis using an Ion Torrent Personal Genome Machine platform. (A) Total reads mapped in the reference genome (H5N8). (B) Average depth of coverage.
